# Supplementary material for: Hsp40 Gene Therapy Exerts Therapeutic Effects on Polyglutamine Disease Mice via a Non-Cell Autonomous Mechanism
Source: PLOS journal article supplement (doi:10.1371/journal.pone.0051069), 2012-11-30

## Supplementary Fig. S1

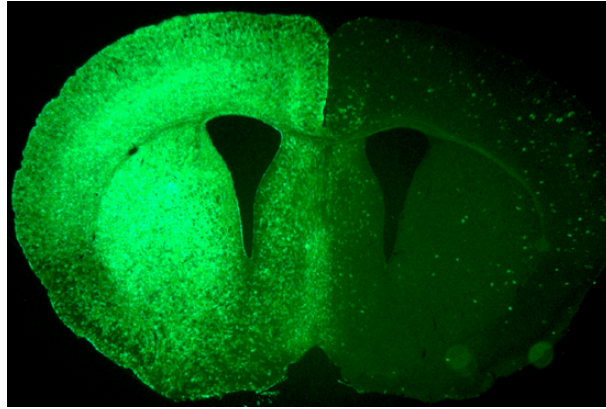

Supplement: S1 (10.1371/journal.pone.0051069.s001) [file journal.pone.0051069.s001]
